# Supplementary material for: Cryptic splicing of stathmin-2 and UNC13A mRNAs is a pathological hallmark of TDP-43-associated Alzheimer’s disease
Source: PubMed Central journal article supplement (PMC10766724; doi:10.1007/s00401-023-02655-0), 2024-01-04
Supplement: 401_2023_2655_MOESM1_ESM.pdf [file 401_2023_2655_MOESM1_ESM.pdf]

# **Cryptic splicing of Stathmin-2 and UNC13A mRNAs is a pathological hallmark of TDP-43-associated Alzheimer's disease**

Ana R. A. A. Quadros<sup>1,2,3†</sup>, Zhaozhi Li<sup>2†</sup>, Xue Wang<sup>4†</sup>, I. Sandra Ndayambaje<sup>1,2</sup>, Sandeep Aryal<sup>1,2,3</sup>, Nandini Ramesh<sup>1,2,3</sup>, Matthew Nolan<sup>1,2,3</sup>, Rojashree Jayakumar<sup>2</sup>, Yi Han<sup>1,2</sup>, Hannah Stillman<sup>1,2</sup>, Corey Aguilar<sup>1,2</sup>, Hayden J. Wheeler<sup>1,2</sup>, Theresa Connors<sup>5</sup>, Jone Lopez-Erauskin<sup>6</sup>, Michael W. Baughn<sup>6</sup>, Ze'ev Melamed<sup>6</sup>, Melinda S. Beccari<sup>6</sup>, Laura Olmedo Martínez<sup>1,2</sup>, Michael Canori<sup>1,2,3</sup>, Chao-Zong Lee<sup>1,2</sup>, Laura Moran<sup>1,2</sup>, Isabelle Draper<sup>7</sup>, Alan S. Kopin<sup>7</sup>, Derek H. Oakley<sup>5</sup>, Dennis W. Dickson<sup>8</sup>, Don W. Cleveland<sup>6</sup>, Bradley T. Hyman<sup>2</sup>, Sudeshna Das<sup>2,10</sup>, Nilüfer Ertekin-Taner<sup>8,9,10</sup>, Clotilde Lagier-Tourenne<sup>1,2,3,10</sup>

**†These authors contributed equally to this work.**

## **Author affiliations:**

- 1 Department of Neurology, The Sean M. Healey and AMG Center for ALS, Massachusetts General Hospital, Harvard Medical School, Boston, MA, USA
- 2 MassGeneral Institute for Neurodegenerative Diseases (MIND), Massachusetts General Hospital, Harvard Medical School, Boston, MA, USA
- 3 Broad Institute of Harvard University and MIT, Cambridge, MA, USA
- 4 Department of Quantitative Health Sciences, Mayo Clinic, Jacksonville, FL, USA
- 5 Department of Pathology, Massachusetts General Hospital, Harvard Medical School, Boston, MA, USA
- 6 Department of Cellular and Molecular Medicine, University of California at San Diego, La Jolla, CA, USA
- 7 AUTTX LLC, Wellesley, MA, USA
- 8 Department of Neuroscience, Mayo Clinic, Jacksonville, FL, USA
- 9 Department of Neurology, Mayo Clinic, Jacksonville, FL, USA
- 10 Correspondence to: Sudeshna Das, Nilüfer Ertekin-Taner, Clotilde Lagier-Tourenne.

Full address: Department of Neurology, Massachusetts General Hospital, Harvard Medical School, Boston, MA, USA

E-mail: SDAS5@mgh.harvard.edu ; Taner.Nilufer@mayo.edu ; clagier-tourenne@mgh.harvard.edu

**Running title:** Loss of STMN2 and UNC13A in Alzheimer's disease

**Journal:** Acta Neuropathologica

## Supplementary Figures and legends

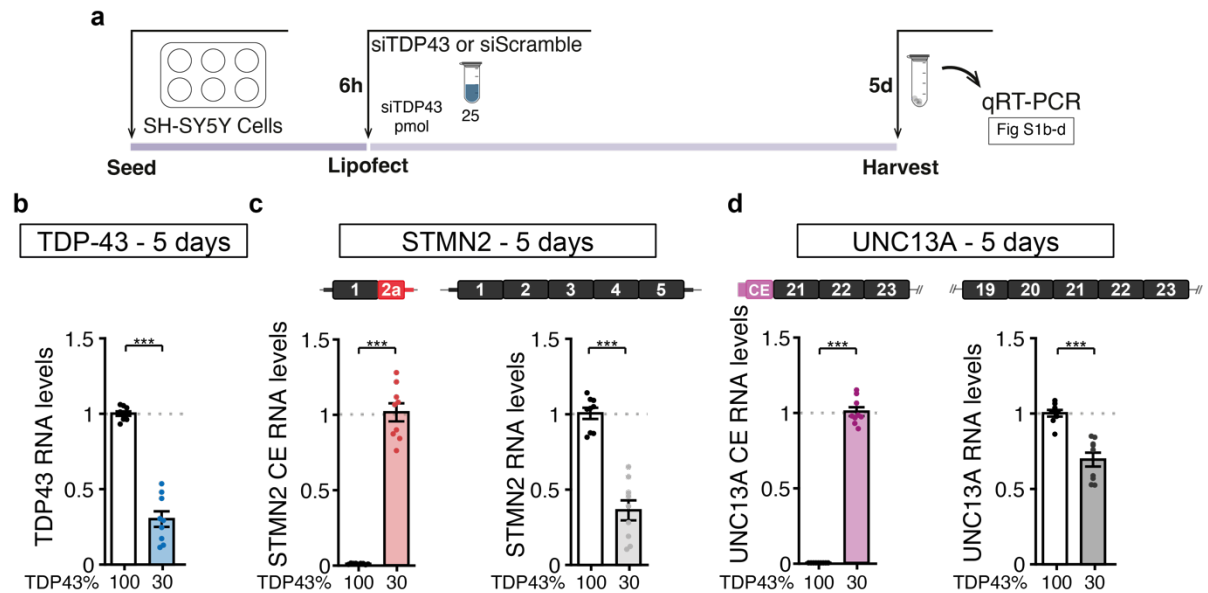

**Supplementary Figure S1: Processing of *STMN2* and *UNC13A* mRNAs in neuroblastoma cells after 5 days of TDP-43 knockdown.** (a) Scheme of experimental design for treatment of SH-SY5Y with 25 pmol of TDP-43 or scramble siRNAs during 5 days. (b-d) qRT-PCR was performed to quantify the RNA levels of *TDP-43* (b, blue), *STMN2* transcripts with cryptic exon (c, red), *STMN2* full-length (c, light gray), *UNC13A* transcripts with cryptic exon (d, purple) and *UNC13A* full-length (d, dark gray). Results from 3 independent experiments are included with each dot representing biological replicates and bars representing mean  $\pm$  SEM. Normal distribution of the data was tested using D'Agostino & Pearson test and an unpaired t-test (parametric) or Mann-Whitney test (non-parametric) were performed accordingly.

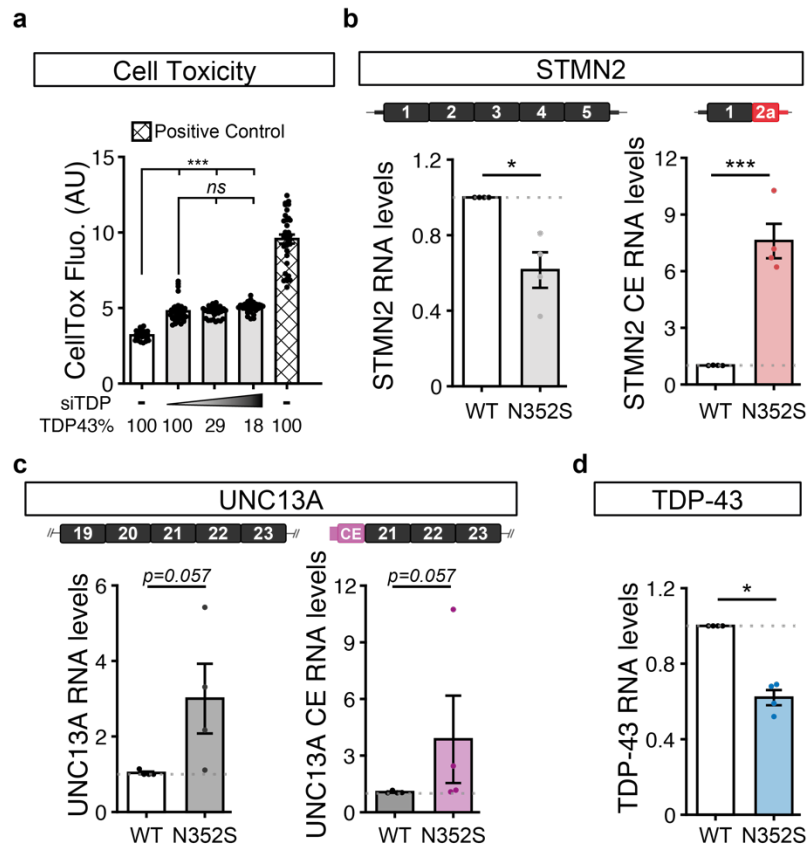

**Supplementary Figure S2: Expression of *STMN2* and *UNC13A* mRNAs in neuroblastoma cells.** (a) Potential toxicity of knocking down TDP-43 was evaluated using a CellTox green assay that measures cell-membrane integrity with a fluorescent dye, in cells treated with 2.5 pmol or 25 pmol of siTDP43 for 5 days. (b-d) RNA from SH-SY5Y cells CRISPR-edited to express an ALS-associated mutation of TDP-43 (N352S) [8] was quantified to determine the transcript levels of *STMN2* full length (b, light gray), *STMN2* transcripts with cryptic exon (b, red), *UNC13A* full length (c, dark gray), *UNC13A* transcripts with cryptic exon (c, purple) and *TDP-43* (d, blue). Results from 3 or 4 independent experiments are included with each dot representing replicates and bars representing mean  $\pm$  SEM. Normal distribution of data was tested using D'Agostino & Pearson test and an unpaired t-test (parametric) or Mann-Whitney test (non-parametric), or a Kruskal-Wallis, followed by a Dunn's Multiple comparisons post-hoc test (non-parametric) were performed accordingly.

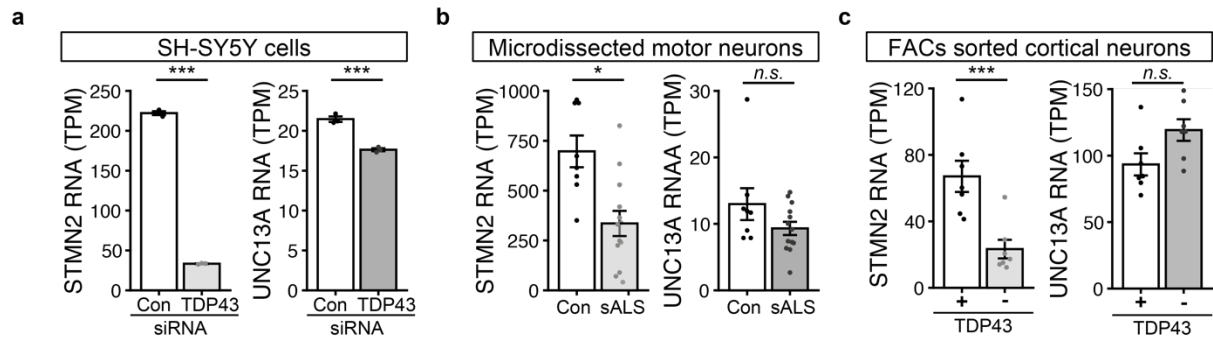

**Supplementary Figure S3: Levels of *STMN2* and *UNC13A* transcripts in different human cells with disrupted TDP-43.** (a-c) *STMN2* and *UNC13A* full-length levels (transcripts per million, TPM) in (a) SH-SY5Y neuroblastoma cells treated with siRNA against TDP-43 [8], (b) laser microdissected motor neurons from patients with sporadic amyotrophic lateral sclerosis (sALS) [5], and (c) cortical neurons FACs sorted for the presence (+) or absence (-) of nuclear TDP-43 [6]. Normal distribution of data was tested using D'Agostino & Pearson test and an unpaired t-test (parametric) or Mann-Whitney test (non-parametric) were performed accordingly.

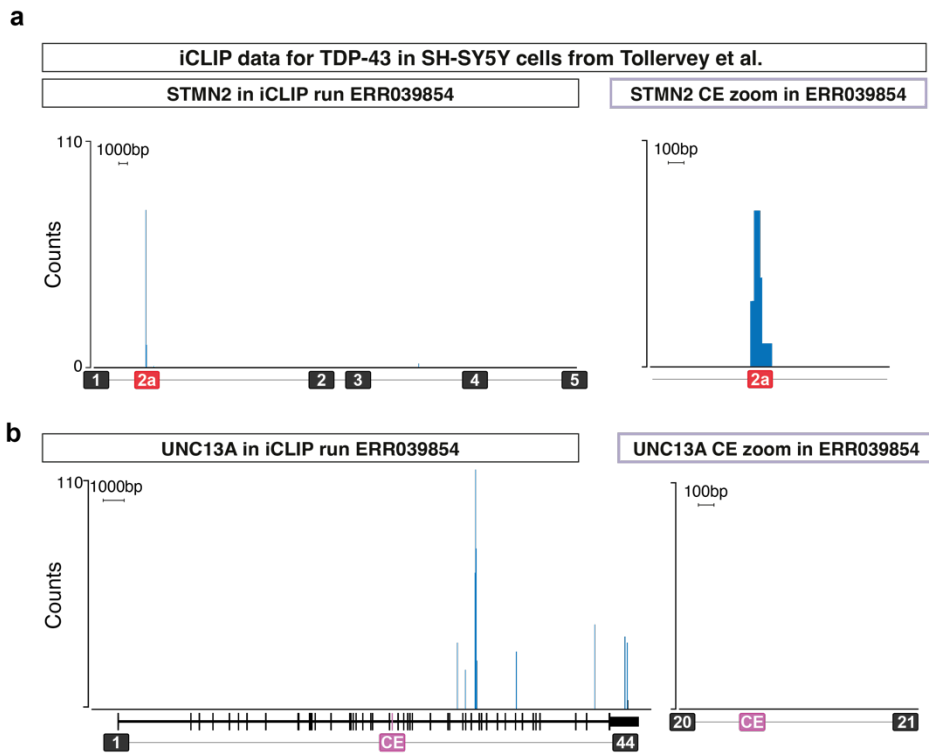

**Supplementary Figure S4: TDP-43 binding to *STMN2* and *UNC13A* transcripts.** (a-b) Gene browser track showing TDP-43 binding sites on *STMN2* (a) and *UNC13A* (b) pre-mRNAs determined by iCLIP for TDP-43 in human SH-SY5Y cells [9]. Results from the ERR039854 iCLIP run are represented showing both the full pre-mRNAs (left) and the region surrounding the *STMN2* and *UNC13A* cryptic exons (right).

a

UNC13A pre mRNA

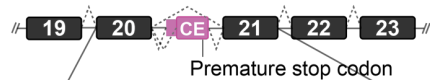

```

ACAAGCGAACUGACAAAUCUGCCGUGUCGGGUGCCAUCGGGC
UCCACAUCAGUGGGAGAUCAAAGCGGAGGAGAAGGUGGCC
CGUACCAUGUCCAGUACACCCUGUCUGCAUGAGGUGAGGGUCAU
UGCUCGGCCCCUCCCAUGCCACUCCACUACCAUCCUGCCUGC
CCAGCUCUUCUCUUCUGGCCACACCAUCCACACUCUCUGGCC
CUCUGAGACUGCCGCCAUGCCAUCUCCUUUACCUGGAAAACUC
UCCCUAUCCAUCAAAGUCCAGAUUCAGGGUCACCCUCCUCUGGAA
GCCACCUCUGGCCUCCAGGUUAGCUCUCACUACUACUACAGGU
UCUUCUUAUUCAGCCCUAACCCACUCAGGAUUGGGCCGUU
GUGUCUGGGUAGUCUCUUCAGCUGCCUGGGUUCCUGGAAA
GAACUCUUUACCCAGGAACUAGUUUGUUGAAUAAUUGCUGG
UGAAUGAAUGAAUGAUUGAACAGAUAAUGAGUGAUGAGUA
GAUAAAAGGAUGGAUGGAGAGAUUGGAGUACAUGGAUGGA
UAGAUUGGAUGAGUUGGUGGGUAGAUUCGUGGCUAGAUUGGAU
UGGAUGGAUGGACAGAUUGGAUGGAUUAUGAUUGAACUUAUGAA
AGUUAUGAGUUAUGGAGUGGGUAGAUUUGGGGGUAAUUGUUA
UGAUUGGAUGAGUUAUGAUUGAUUGGAUGGAAUUCUUGAGAG
UGGAUAGAUAGAUUGCGGAUAGAUUGACUGGGUGGAUAGA
UGAAAUGUUGGAUGAGCAGAUUAAGUUGUUAUUGGAUGGGAUGG
AUGGAAGUUGGUUAGAUUAUJAGAAGGAAGAUUGAGUAGAU
GGUAGAUUUGUUAUGUAGUCAGAUUGGUAAGAUAGGUAUGAU
GGAUGGAUGGAGUUGGAUGUUAUAGGCAGAUUGGACAAUUGGAUGAU
GGGUGGGUGGAUGAAUGGAAGGAGUGUGUUGUUAACUUAUGCA
AGUUAUGAAUUAUGGGUUAUUAUUCUGAAUUAUJAGAUUGGAU
GGUUGUGAGUGGCUGGUGGACAGACGAAAAUUGGAUGGUUGGA
UAAAUGAUGGGUGGAUGGAGGUUGGUUGUUAUGAAAGAUA
AUGAUUGGGUAGGUGGAUUAAGUUGCGGAUCAUUAUGGGAU
GGAUGAUUGGAUGGAGUUGGAUGGAGUGUGGUGUUAUUAUCUGAA
AGGUUGGAAGAGUGGAGUGGGUGAAUUAUGGGUAGUUAUGAGG
GUGGGUGUGUGGAGUAAAAGAGUAGAUAAUUAUUAUG
AAUAAACAGGCAGAUUGGAUGAUUAAGCUGCCCCAGACCCUGGG
ACCUCUGACCCCCGGCACCUCUCCACUCUCCAUAGACACUUCU
CUCCAUUGGUGGACAGAACCUUGUCCACUUCUGAGCCGACGUGG
AGAACAAUGGGGUCUGGAAGAUCCAGAUUGCCAGGGGUGACG
AUGCCUGGAAGGUUAUACGAUGAGACAGCCAGGAGAUUG
UGGACGAGUUUGCAUUGCGCUACGGCGUCGAGUCCAUCUACC
AAGCCAUGAC

```

b

Stathmin-2 pre mRNA

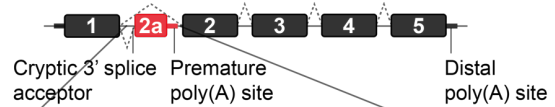

```

AGCGAGUAAAACAGGCAGGUAUGUAGUACUGAGGAGGUGUACC
AAAACUGACUGCUGUUAUUUUUCCCAUCUUCUAAAGUCUGUCU
UUCUUUUCCAUUUAAGAUACCUUUUUAAAUCUAAUCCAUGU
GAUUUCAAUUAGUUUUUAUCAGAUUUCAACAAUUAUUGAGCAU
CUCCUUGUAGUGGUUUUCUGUUUAUJAGAAAUCGAUGUUAU
UUUAAACGAAGUAAGAAGAAUUAUAAAGUAUAAAUUUUUU
GGUAUCAUCAAAGUGGAAUUUUUAAUUAUGCAUUUGAUAGAAU
UAUUUUUUGAUUACAUUUUUAUGUAUUUCAAUCCAGCUAUA
AUUUUAUAGUGUCAUUAUCUGUUCUCAACUUAUGAU
UGCAUUAUGAAUUAACUUUGAUUUUCAUUAAAAGCAAUUCUG
AUUCAUACAUUCUGGCUUGAGGCAGACAUUCUGUCUCCGAAC
AAGCUCCCAGAUAGUCUGAUUCUGACCACUAAACACUACAGUU
UUAGGGAUUAUUAACUUGUAUUAUACAGGUAUCCUCCUGGUA
GCUCUGGUUAUUAUGUCUUAACAUUUUUAAUUAUGGUAUCU
UUACAAAUAUUUUAUCUCCGAACUUAUUAUCCUGGGGAUUU
AUUAUCUGGGAAUUAUGUUGUUCUCCCAUCACUCUCUUA
AUUGGAUUUUUAAAUAUUAUUAUUAUUGCAGGACUCGGCAG
AAGACCUUCGAGAGAAAGGUAAGAAUUAAGAAUUGGCUCU
CUGUGUGAGCAUGUGUGCGUGUGCGAGAGAGAGAGACA
GACAGCCUGCCUUAAGAAGAAUUGAAUGGAGCGGCUUGU
GGCAGAUUGACAAGGAUGAUAAUCAAUUAUGCAAGCUUAC
UAUCAUUUAUGAAUAGCAUACUGAAGAAUUAACAAAAGAA
UUGCUCUCUCAAUUAUCUUAUUAUUUAUUUAUUAUUAUUA
UCUAAGAGUUAUUUCUCCUGAAUACCAUGUGAGAAAUAUUA
AGAAUUUAUUGAGUAUGACUGUAUUUUUAAAAGAGUGUUUC
UUCUGCUUAUCUAAAGCAAUAAAGGAUCUUAUUUAUUAUUA
UAACUUUCUAAGGAAGUCAACCAUCAGAUCAAGAAAGGAGUC
UCAAGGAUAGCAUCAAAGACAUAGUCAGGUCUCCAUUGCAGU
GACUGGCUGACCAUGCAGCAUUAACACCUUUCUGGAAUUAU
UGCUGCAAAAAGUAUACAUAACACGAAUUAUCUAAUUAUUA
AUUAACAUUUCCAAUAGGGCAUAAAACAUGAUCCAAU
AAAACUAGCUUCAGGGUUGCAGAAUUAUCUGUUAUCUACAC
AAAGUUGGACUAAGUCUCAAAGUUAAGCAUUCAGUUGUUGUA
ACAGUUAUUUAGGGUCUCUCAGAAGCUGGGAACUUAUUA
UUUUGCAUUUUCUUAUUAUUAAGGAAGGAAGACACUUA
AGACAGCAUUAACAAAAGUAUUAUUAUUAUUAUUAUUAU
UGGCAGUCGGCAGGGUCUCUGUA

```

**Supplementary Figure S5: TDP-43 binding motifs in *STMN2* and *UNC13A* transcripts.** Sequence of *UNC13A* (a) and *STMN2* (b) pre-mRNAs, with the regions of TDP-43 binding identified by iCLIP [4, 9]. UG-rich motifs are highlighted in blue, and the sequence predicted to be bound by TDP-43 is underlined [4]. Cryptic exons are bolden in purple (*UNC13A*, a) and red (*STMN2*, b). Exons 20 and 21 of *UNC13A* transcript are bolded in gray (a).

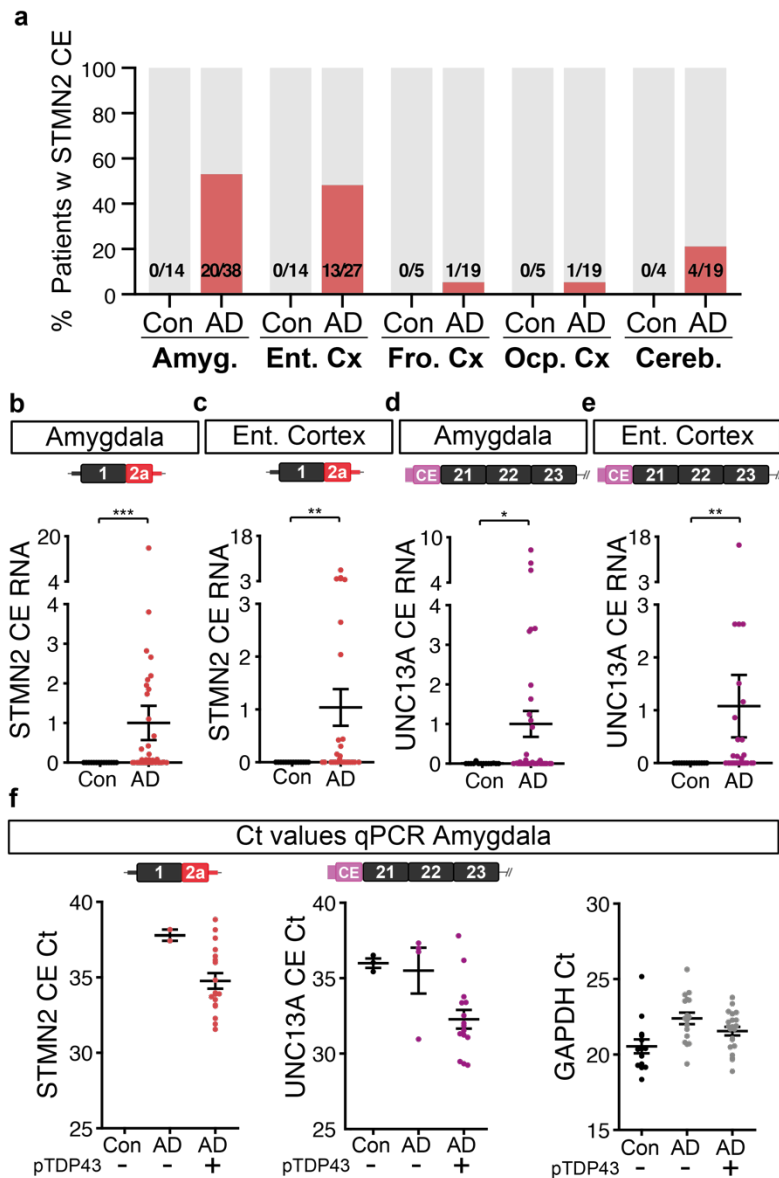

**Supplementary Figure S6: Detection of *STMN2* and *UNC13A* cryptic exons in the amygdala and entorhinal cortex of post-mortem tissue from Alzheimer's disease patients.** (a) Percentage of control or Alzheimer's disease patients in which *STMN2* cryptic exon was detected by qRT-PCR in different brain regions: amygdala (Amyg.), entorhinal cortex (Ent. Cx), frontal cortex (Fro. Cx), occipital cortex (Ocp. Cx) and cerebellum (Cereb.). Numbers of positive cases/total cases tested are indicated. Tissues were considered to have cryptic exons when an amplification curve was detected by qRT-PCR in all 3 triplicates. (b-c) Levels of truncated *STMN2* RNA (red) measured by qRT-PCR in post-mortem frozen amygdala (b) or entorhinal cortex (c) from control (Con) and patients with Alzheimer's disease (AD). (d-e) Levels of *UNC13A* cryptic exon (purple) measured by qRT-PCR in the amygdala (d) and entorhinal cortex (e). Data represent mean  $\pm$  SEM, each dot represents results from individual patients. Normal distribution of data was tested using D'Agostino & Pearson test and an unpaired t-test (parametric) or Mann-Whitney test (non-parametric) were performed accordingly. (f) qRT-PCR cycle in which the levels of *STMN2* cryptic exon (red), *UNC13A* cryptic exon (purple) or *GAPDH* transcript (loading control, gray) reach the detection limit (Ct, cycle threshold), which inversely correlates with abundance of the target transcript in the amygdala of controls or Alzheimer's disease patients.

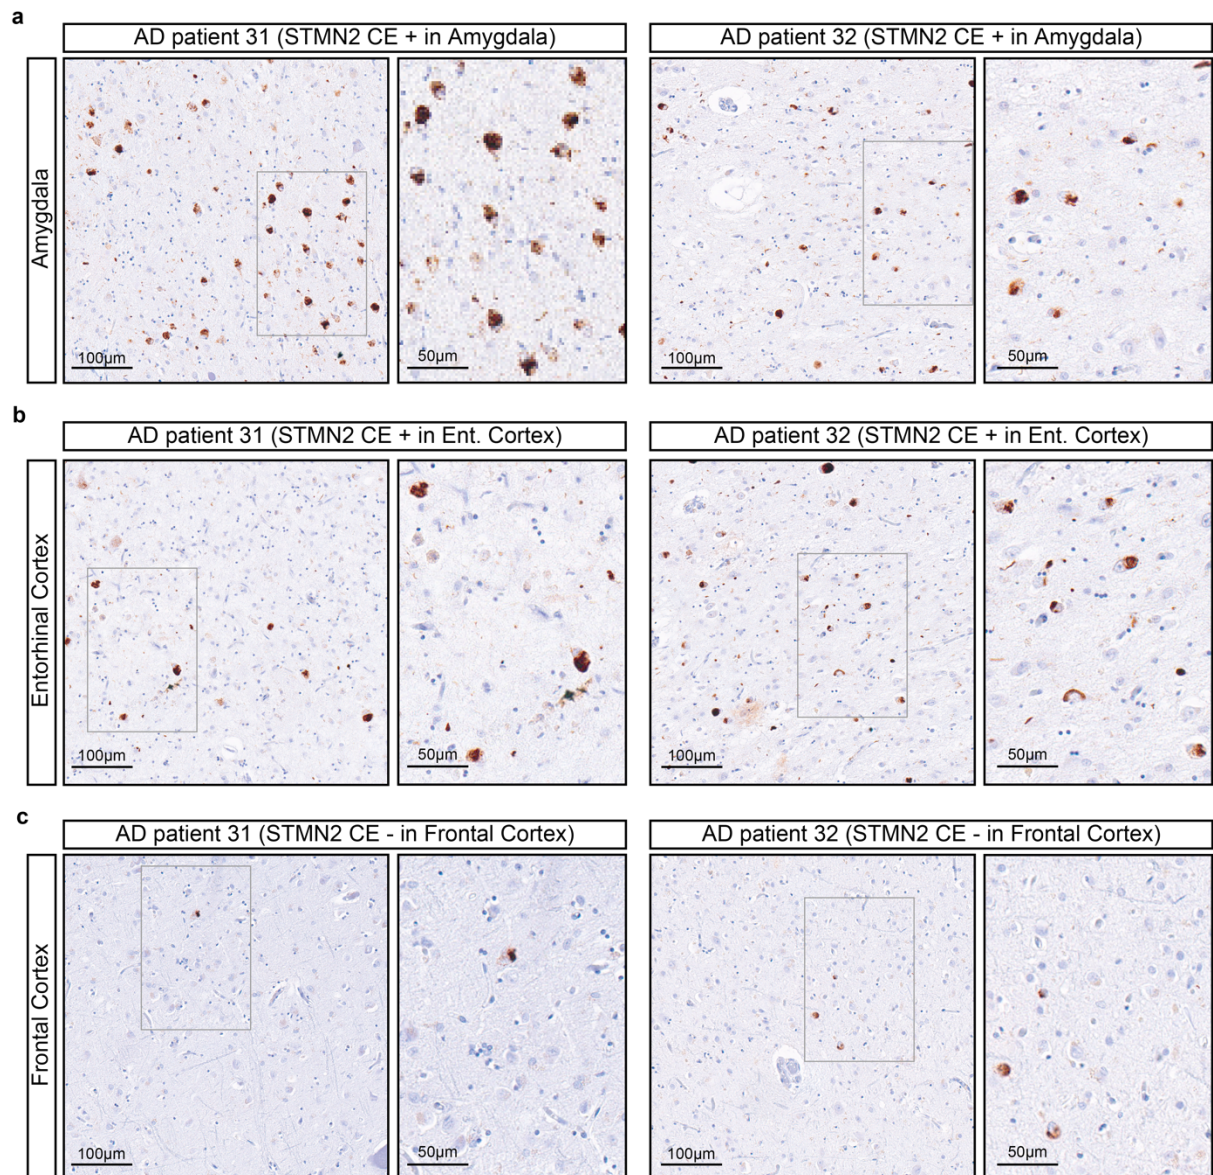

**Supplementary Figure S7: TDP-43 pathology burden in different brain regions.** Example micrographs of post-mortem brain tissue from Alzheimer's dementia patients 31 (left) and 32 (right) in the amygdala (**a**), entorhinal cortex (**b**) and frontal cortex (**c**), after immunohistochemical detection of phosphorylated TDP-43 (pTDP43). Scale bar is 100µm on the left images and 50µm on the insets.



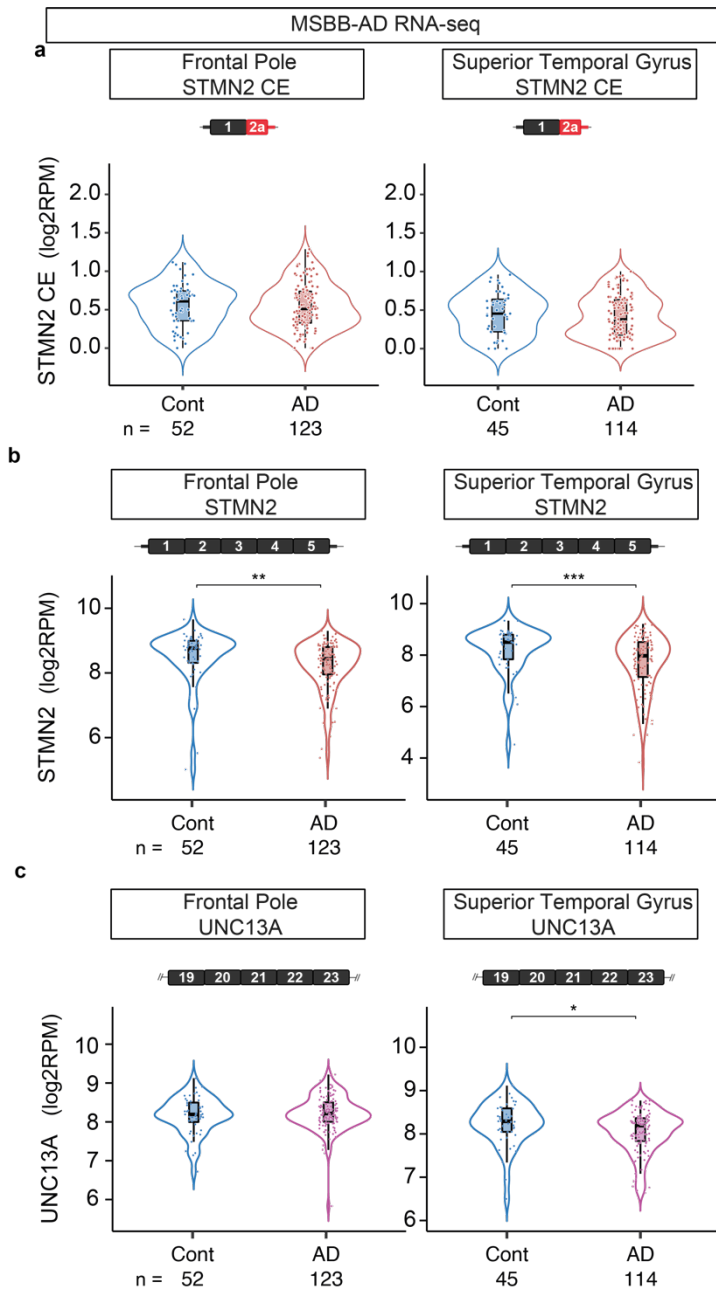

**Supplementary Figure S8: RNA-seq analysis of *STMN2* and *UNC13A* mRNAs in frontal pole and superior temporal gyrus. (a-b) *STMN2* cryptic exon (a) and full-length (b), and *UNC13A* full-length (c) levels determined by RNA-seq analysis of the frontal pole and superior temporal gyrus from controls and Alzheimer's disease patients (data from Mount Sinai/JJ Peters VA Medical Center Brain Bank (MSBB-AD) [10]).**

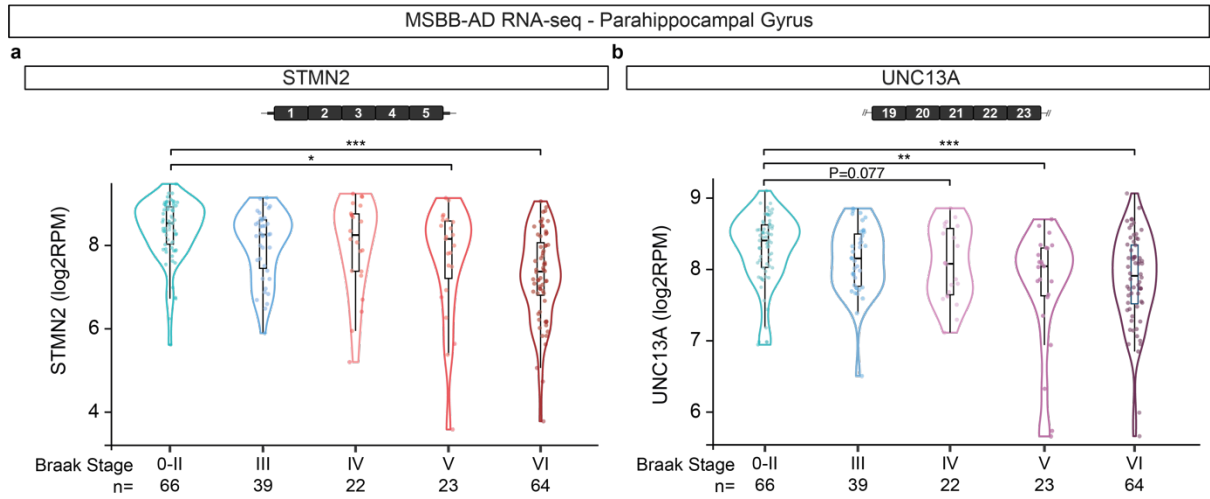

**Supplementary Figure S9: RNA-seq analysis of *STMN2* and *UNC13A* mRNAs in parahippocampal gyrus with different Braak stages. (a-b) *STMN2* (a) and *UNC13A* (b) full-length RNA levels determined by RNA-seq analysis of parahippocampal gyrus from controls (Braak stages 0-II) and Alzheimer's disease patients classified according to their Braak stage (data from Mount Sinai/JJ Peters VA Medical Center Brain Bank (MSBB-AD) [10]).**

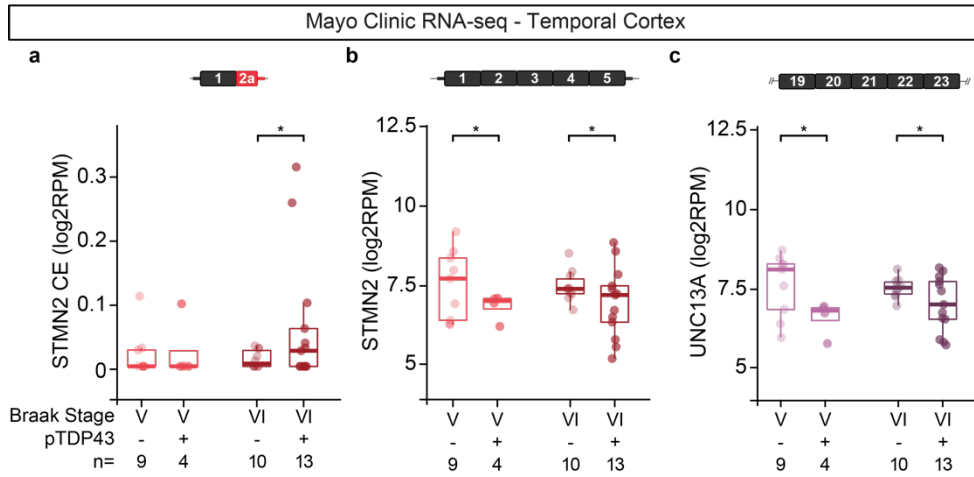

**Supplementary Figure S10: RNA-seq analysis of *STMN2* and *UNC13A* mRNAs in Alzheimer's disease patients with Braak stages V and VI.** (a-c) *STMN2* cryptic exon (a), and full-length *STMN2* (b) and *UNC13A* (c) transcript levels determined by RNA-seq analysis of temporal cortex from Alzheimer's disease patients with Braak stages V and VI. Brains with (+) and without (-) TDP-43 pathology were compared (data from Mayo Clinic [1, 2, 11]).

## Supplementary Tables

**Supplementary Table 1 – Probes and primers information.**

| Target                     | Application   | Primer/Probe | Sequence (5'-3')                     | Ref.   |
|----------------------------|---------------|--------------|--------------------------------------|--------|
| Stathmin-2<br>Cryptic Exon | RT-PCR        | Primer Fw    | GCCTCTTGCTCTTTCTCTAGCACG             | [8]    |
|                            |               | Primer Rv    | TTTCTCTCGAAGGTCTTCTG                 | [8]    |
| Stathmin-2                 | qPCR          | Primer Fw    | AGCTGTCCATGCTGTCACTG                 | [3, 8] |
|                            |               | Primer Rv    | GGTGGCTTCAAGATCAGCTC                 | [3, 8] |
|                            |               | Probe        | ATTTGCTTCACTTCCATATCATCGTAAGTATAGATG | [3]    |
| Stathmin-2<br>Cryptic Exon | qPCR          | Primer Fw    | CTTTCTCTAGCACGGTCCCAC                | [3]    |
|                            |               | Primer Rv    | ATGCTCACACAGAGAGCCAAATTC             | [3]    |
|                            |               | Probe        | CTCTCGAAGGTCTTCTGCCG                 | [3]    |
| hnRNP L                    | qPCR          | Primer Fw    | GTGGAGATGGCTGATGGCTAC                |        |
|                            |               | Primer Rv    | GCTCATCGCAGATCTCAAAGAAG              |        |
| UNC13A<br>(Exons 19-20)    | qPCR          | Primer Fw    | GGACGTGTGGTACAACCTGG                 | [7]    |
|                            |               | Primer Rv    | GTGTACTGGACATGGTACGGG                | [7]    |
| UNC13A<br>(Exons 9-10)     | qPCR          | Primer Fw    | CAGTGA CTCCATGCACAGTTA               |        |
|                            |               | Primer Rv    | TCAGCTGAGAGCTTCCCT                   |        |
| UNC13A<br>Cryptic Exon     | qPCR & RT-PCR | Primer Fw    | TGGATGGAGAGATGGAACCT                 | [7]    |
|                            |               | Primer Rv    | GGGCTGTCTCATCGTAGTAAAC               | [7]    |
|                            | qPCR          | Probe        | TTGGCATCTGGGATCTTCACGACC             |        |
| GAPDH                      | qPCR & RT-PCR | Primer Fw    | GAAGGTGAAGGTCGGAGTC                  | [3, 8] |
|                            |               | Primer Rv    | GAAGATGGTATGGGATTTTC                 | [3, 8] |
|                            | qPCR          | Probe        | CAAGCTTCCCGTTCTCAGCC                 | [3]    |

**Supplementary Table 2 – Patient Information.**

| Subject | Condition | Age at death | Sex    | Braak Stage |
|---------|-----------|--------------|--------|-------------|
| Cnt 1   | Control   | 56           | Female | 0           |
| Cnt 2   | Control   | 76           | Female | III         |
| Cnt 3   | Control   | 64           | Female | N/A         |
| Cnt 4   | Control   | 85           | Male   | I           |
| Cnt 5   | Control   | 73           | Male   | 0           |
| Cnt 6   | Control   | 68           | Female | I           |
| Cnt 7   | Control   | 63           | Male   | 0           |
| Cnt 8   | Control   | >90          | Female | II          |
| Cnt 9   | Control   | 77           | Female | I           |
| Cnt 10  | Control   | >90          | Male   | I           |
| Cnt 11  | Control   | >90          | Male   | I           |
| Cnt 12  | Control   | 62           | Male   | 0           |
| Cnt 13  | Control   | 78           | Male   | 0           |
| Cnt 14  | Control   | 59           | Male   | 0           |

| <b>Subject</b> | <b>Condition</b>    | <b>Age at death</b> | <b>Sex</b> | <b>Braak Stage</b> |
|----------------|---------------------|---------------------|------------|--------------------|
| Cnt 15         | Control             | >90                 | Male       | I                  |
| AD 1           | Alzheimer's disease | 63                  | Male       | VI                 |
| AD 2           | Alzheimer's disease | 61                  | Female     | VI                 |
| AD 3           | Alzheimer's disease | 73                  | Female     | VI                 |
| AD 4           | Alzheimer's disease | 58                  | Female     | VI                 |
| AD 5           | Alzheimer's disease | 77                  | Female     | VI                 |
| AD 6           | Alzheimer's disease | 77                  | Male       | VI                 |
| AD 7           | Alzheimer's disease | 66                  | Female     | VI                 |
| AD 8           | Alzheimer's disease | >90                 | Male       | VI                 |
| AD 9           | Alzheimer's disease | 78                  | Female     | VI                 |
| AD 10          | Alzheimer's disease | 70                  | Male       | VI                 |
| AD 11          | Alzheimer's disease | 66                  | Female     | VI                 |
| AD 12          | Alzheimer's disease | 54                  | Female     | VI                 |
| AD 13          | Alzheimer's disease | 70                  | Female     | VI                 |
| AD 14          | Alzheimer's disease | 96                  | Female     | V                  |
| AD 15          | Alzheimer's disease | 70                  | Male       | VI                 |
| AD 16          | Alzheimer's disease | 73                  | Female     | VI                 |
| AD 17          | Alzheimer's disease | 74                  | Male       | V                  |
| AD 18          | Alzheimer's disease | 83                  | Female     | VI                 |
| AD 19          | Alzheimer's disease | 80                  | Male       | VI                 |
| AD 20          | Alzheimer's disease | 61                  | Female     | VI                 |
| AD 21          | Alzheimer's disease | 73                  | Female     | VI                 |
| AD 22          | Alzheimer's disease | >90                 | Female     | V                  |
| AD 23          | Alzheimer's disease | 80                  | Male       | V                  |
| AD 24          | Alzheimer's disease | 82                  | Male       | V                  |
| AD 25          | Alzheimer's disease | 74                  | Female     | VI                 |
| AD 26          | Alzheimer's disease | 72                  | Female     | VI                 |
| AD 27          | Alzheimer's disease | 97                  | Female     | V                  |
| AD 28          | Alzheimer's disease | 74                  | Male       | VI                 |
| AD 29          | Alzheimer's disease | 75                  | Male       | VI                 |
| AD 30          | Alzheimer's disease | 86                  | Female     | VI                 |
| AD 31          | Alzheimer's disease | 72                  | Female     | VI                 |
| AD 32          | Alzheimer's disease | 87                  | Female     | VI                 |
| AD 33          | Alzheimer's disease | >90                 | Male       | VI                 |
| AD 34          | Alzheimer's disease | 65                  | Male       | VI                 |
| AD 35          | Alzheimer's disease | 76                  | Female     | VI                 |
| AD 36          | Alzheimer's disease | 88                  | Female     | VI                 |
| AD 37          | Alzheimer's disease | >=90                | Male       | VI                 |
| AD 38          | Alzheimer's disease | >=90                | Male       | V                  |
| AD 39          | Alzheimer's disease | 86                  | Male       | VI                 |

**Supplementary Table 3 – Postmortem tissue analysis of TDP-43-associated pathological changes.**

| Subject | Condition | TDP43 stage | Amygdala |          |           | Entorhinal Cortex |           | Frontal Cortex | Ocp. Cortex | Cereb.   |
|---------|-----------|-------------|----------|----------|-----------|-------------------|-----------|----------------|-------------|----------|
|         |           |             | pTDP43   | STMN2 CE | UNC13A CE | STMN2 CE          | UNC13A CE | STMN2 CE       | STMN2 CE    | STMN2 CE |
| Cnt 1   | Control   | 0           | No       | 0        | 0         | 0                 | 0         | NA             | NA          | NA       |
| Cnt 2   | Control   | 0           | No       | 0        | 0         | 0                 | 0         | NA             | NA          | NA       |
| Cnt 3   | Control   | 0           | No       | 0        | 0         | 0                 | 0         | NA             | NA          | NA       |
| Cnt 4   | Control   | 0           | No       | 0        | 0         | 0                 | 0         | NA             | NA          | NA       |
| Cnt 5   | Control   | 0           | No       | 0        | 0         | 0                 | 0         | NA             | NA          | NA       |
| Cnt 6   | Control   | 0           | No       | 0        | 0         | 0                 | 0         | NA             | NA          | NA       |
| Cnt 7   | Control   | 0           | No       | 0        | 0         | 0                 | 0         | NA             | NA          | NA       |
| Cnt 8   | Control   | 0           | No       | 0        | 0         | 0                 | 0         | 0              | 0           | 0        |
| Cnt 9   | Control   | 0           | No       | 0        | 0         | 0                 | 0         | 0              | 0           | 0        |
| Cnt 10  | Control   | 0           | No       | 0        | 0         | 0                 | 0         | 0              | 0           | 0        |
| Cnt 11  | Control   | 0           | No       | 0        | 0         | 0                 | 0         | 0              | 0           | 0        |
| Cnt 12  | Control   | 0           | No       | 0        | 1         | 0                 | 0         | NA             | NA          | NA       |
| Cnt 13  | Control   | 0           | No       | 0        | 1         | 0                 | 0         | NA             | NA          | NA       |
| Cnt 14  | Control   | 0           | No       | 0        | 1         | 0                 | 0         | NA             | NA          | NA       |
| Cnt 15  | Control   | 0           | No       | NA       | NA        | NA                | NA        | 0              | 0           | NA       |
| AD 1    | Alzheimer | 0           | No       | 0        | 0         | 0                 | 0         | NA             | NA          | NA       |
| AD 2    | Alzheimer | 0           | No       | 0        | 0         | 0                 | 0         | NA             | NA          | NA       |
| AD 3    | Alzheimer | 0           | No       | 0        | 0         | 0                 | 0         | NA             | NA          | NA       |
| AD 4    | Alzheimer | 0           | No       | 0        | 0         | 0                 | 0         | 0              | 0           | 0        |
| AD 5    | Alzheimer | 0           | No       | 0        | 0         | 0                 | 0         | 0              | 0           | 0        |
| AD 6    | Alzheimer | 0           | No       | 0        | 0         | 0                 | 0         | 0              | 0           | 0        |
| AD 7    | Alzheimer | 0           | No       | 0        | 0         | 0                 | 0         | 0              | 0           | 0        |
| AD 8    | Alzheimer | 0           | No       | 0        | 0         | 0                 | 0         | 0              | 0           | 0        |
| AD 9    | Alzheimer | 0           | No       | 0        | 0         | NA                | NA        | NA             | NA          | NA       |
| AD 10   | Alzheimer | 0           | No       | 0        | 0         | NA                | NA        | NA             | NA          | NA       |
| AD 11   | Alzheimer | 0           | No       | 0        | 0         | NA                | NA        | NA             | NA          | NA       |
| AD 12   | Alzheimer | 0           | No       | 0        | 0         | NA                | NA        | NA             | NA          | NA       |
| AD 13   | Alzheimer | 0           | No       | 0        | 0         | NA                | NA        | NA             | NA          | NA       |
| AD 14   | Alzheimer | 0           | No       | 0        | 1         | 0                 | 0         | NA             | NA          | NA       |
| AD 15   | Alzheimer | 0           | No       | 0        | 1         | NA                | NA        | NA             | NA          | NA       |
| AD 16   | Alzheimer | 0           | No       | 1        | 1         | 0                 | 1         | 1              | 1           | 1        |
| AD 17   | Alzheimer | 0           | No       | 1        | 1         | 1                 | 0         | 0              | 0           | 0        |
| AD 18   | Alzheimer | NA          | Yes      | 0        | 0         | 0                 | 0         | NA             | NA          | NA       |
| AD 19   | Alzheimer | III         | Yes      | 0        | 0         | 0                 | 0         | 0              | 0           | 0        |
| AD 20   | Alzheimer | I           | Yes      | 0        | 0         | 0                 | 0         | 0              | 0           | 0        |
| AD 21   | Alzheimer | I           | Yes      | 1        | 0         | NA                | NA        | NA             | NA          | NA       |
| AD 22   | Alzheimer | II          | Yes      | 1        | 0         | 1                 | 1         | 0              | 0           | 0        |
| AD 23   | Alzheimer | III         | Yes      | 1        | 0         | 1                 | 1         | 0              | 0           | 0        |
| AD 24   | Alzheimer | NA          | Yes      | 1        | 1         | 0                 | 1         | NA             | NA          | NA       |
| AD 25   | Alzheimer | NA          | Yes      | 1        | 1         | 1                 | 1         | NA             | NA          | NA       |

| Subject | Condition | TDP43 stage | Amygdala |          |           | Entorhinal Cortex |           | Frontal Cortex | Ocp. Cortex | Cereb.   |
|---------|-----------|-------------|----------|----------|-----------|-------------------|-----------|----------------|-------------|----------|
|         |           |             | pTDP43   | STMN2 CE | UNC13A CE | STMN2 CE          | UNC13A CE | STMN2 CE       | STMN2 CE    | STMN2 CE |
| AD 26   | Alzheimer | II          | Yes      | 1        | 1         | 1                 | 1         | NA             | NA          | NA       |
| AD 27   | Alzheimer | NA          | Yes      | 1        | 1         | 1                 | 1         | NA             | NA          | NA       |
| AD 28   | Alzheimer | II          | Yes      | 1        | 1         | 1                 | 0         | 0              | 0           | 0        |
| AD 29   | Alzheimer | II          | Yes      | 1        | 1         | 1                 | 1         | 0              | 0           | 1        |
| AD 30   | Alzheimer | II          | Yes      | 1        | 1         | 1                 | 1         | 0              | 0           | 1        |
| AD 31   | Alzheimer | III         | Yes      | 1        | 1         | 1                 | 1         | 0              | 0           | 0        |
| AD 32   | Alzheimer | III         | Yes      | 1        | 1         | 1                 | 1         | 0              | 0           | 0        |
| AD 33   | Alzheimer | II          | Yes      | 1        | 1         | 1                 | 1         | 0              | 0           | 0        |
| AD 34   | Alzheimer | II          | Yes      | 1        | 1         | 1                 | 1         | 0              | 0           | 0        |
| AD 35   | Alzheimer | NA          | Yes      | 1        | 1         | NA                | NA        | NA             | NA          | NA       |
| AD 36   | Alzheimer | I           | Yes      | 1        | 1         | NA                | NA        | NA             | NA          | NA       |
| AD 37   | Alzheimer | NA          | Yes      | 1        | 1         | NA                | NA        | NA             | NA          | NA       |
| AD 38   | Alzheimer | NA          | Yes      | 1        | 1         | NA                | NA        | NA             | NA          | NA       |
| AD 39   | Alzheimer | NA          | Yes      | NA       | NA        | NA                | NA        | 0              | 0           | 0        |

## References

- 1 Allen M, Carrasquillo MM, Funk C, Heavner BD, Zou F, Younkin CS, Burgess JD, Chai HS, Crook J, Eddy JA, *et al* (2016) Human whole genome genotype and transcriptome data for Alzheimer's and other neurodegenerative diseases. *Sci Data* 3: 160089 Doi 10.1038/sdata.2016.89
- 2 Allen M, Wang X, Burgess JD, Watzlawik J, Serie DJ, Younkin CS, Nguyen T, Malphrus KG, Lincoln S, Carrasquillo MM, *et al* (2018) Conserved brain myelination networks are altered in Alzheimer's and other neurodegenerative diseases. *Alzheimers Dement* 14: 352-366 Doi 10.1016/j.jalz.2017.09.012
- 3 Baughn MW, Melamed Z, Lopez-Erauskin J, Beccari MS, Ling K, Zuberi A, Presa M, Gonzalo-Gil E, Maimon R, Vazquez-Sanchez S, *et al* (2023) Mechanism of STMN2 cryptic splice-polyadenylation and its correction for TDP-43 proteinopathies. *Science* 379: 1140-1149 Doi 10.1126/science.abq5622
- 4 Brown AL, Wilkins OG, Keuss MJ, Hill SE, Zanovello M, Lee WC, Bampton A, Lee FCY, Masino L, Qi YA, *et al* (2022) TDP-43 loss and ALS-risk SNPs drive mis-splicing and depletion of UNC13A. *Nature* 603: 131-137 Doi 10.1038/s41586-022-04436-3
- 5 Krach F, Batra R, Wheeler EC, Vu AQ, Wang R, Hutt K, Rabin SJ, Baughn MW, Libby RT, Diaz-Garcia S, *et al* (2018) Transcriptome-pathology correlation identifies interplay between TDP-43 and the expression of its kinase CK1E in sporadic ALS. *Acta Neuropathol* 136: 405-423 Doi 10.1007/s00401-018-1870-7
- 6 Liu EY, Russ J, Cali CP, Phan JM, Amlie-Wolf A, Lee EB (2019) Loss of Nuclear TDP-43 Is Associated with Decondensation of LINE Retrotransposons. *Cell Rep* 27: 1409-1421 e1406 Doi 10.1016/j.celrep.2019.04.003
- 7 Ma XR, Prudencio M, Koike Y, Vatsavayai SC, Kim G, Harbinski F, Briner A, Rodriguez CM, Guo C, Akiyama T, *et al* (2022) TDP-43 represses cryptic exon inclusion in the FTD-ALS gene UNC13A. *Nature* 603: 124-130 Doi 10.1038/s41586-022-04424-7
- 8 Melamed Z, Lopez-Erauskin J, Baughn MW, Zhang O, Drenner K, Sun Y, Freyermuth F, McMahon MA, Beccari MS, Artates JW, *et al* (2019) Premature polyadenylation-mediated loss of stathmin-2 is a hallmark of TDP-43-dependent neurodegeneration. *Nat Neurosci* 22: 180-190 Doi 10.1038/s41593-018-0293-z
- 9 Tollervey JR, Curk T, Rogelj B, Briese M, Cereda M, Kayikci M, Konig J, Hortobagyi T, Nishimura AL, Zupunski V, *et al* (2011) Characterizing the RNA targets and position-dependent splicing regulation by TDP-43. *Nat Neurosci* 14: 452-458 Doi 10.1038/nn.2778
- 10 Wang M, Beckmann ND, Roussos P, Wang E, Zhou X, Wang Q, Ming C, Neff R, Ma W, Fullard JF, *et al* (2018) The Mount Sinai cohort of large-scale genomic, transcriptomic and proteomic data in Alzheimer's disease. *Sci Data* 5: 180185 Doi 10.1038/sdata.2018.185
- 11 Wang X, Allen M, Is O, Reddy JS, Tutor-New FQ, Castanedes Casey M, Carrasquillo MM, Oatman SR, Min Y, Asmann YW, *et al* (2022) Alzheimer's disease and progressive supranuclear palsy share similar transcriptomic changes in distinct brain regions. *J Clin Invest* 132: Doi 10.1172/JCI1149904
